# Supplementary material for: Evaluation of Conspiracy Beliefs, Vaccine Hesitancy, and Willingness to Pay towards COVID-19 Vaccines in Six Countries from Asian and African Regions: A Large Multinational Analysis
Source: MDPI journal article supplement (doi:10.3390/vaccines10111866), 2022-11-04
Supplement: s1 [file s1]

## Supplementary Tables

**Table S1.** Demographic characteristics stratified by country of residence.

| Variables                                                   | Pakistan<br>( <i>n</i> = 599) | Saudi Arabia<br>( <i>n</i> = 485) | India<br>( <i>n</i> = 288) | Malaysia<br>( <i>n</i> = 201) | Sudan<br>( <i>n</i> = 478) | Egypt<br>( <i>n</i> = 430) | <i>p</i> -Value |
|-------------------------------------------------------------|-------------------------------|-----------------------------------|----------------------------|-------------------------------|----------------------------|----------------------------|-----------------|
| <b>Age (years)</b>                                          |                               |                                   |                            |                               |                            |                            |                 |
| ≤25                                                         | 427 (42.3)                    | 205 (42.3)                        | 200 (69.4)                 | 139 (69.2)                    | 64 (13.4)                  | 350 (81.4)                 | <0.001          |
| 26–40                                                       | 140 (23.4)                    | 172 (35.5)                        | 63 (21.9)                  | 38 (18.9)                     | 224 (46.9)                 | 69 (16.0)                  |                 |
| >40                                                         | 32 (5.3)                      | 108 (22.3)                        | 25 (8.7)                   | 24 (39.7)                     | 190 (39.7)                 | 11 (2.6)                   |                 |
| <b>Gender</b>                                               |                               |                                   |                            |                               |                            |                            |                 |
| Male                                                        | 229 (38.2)                    | 181 (37.3)                        | 201 (69.8)                 | 62 (30.8)                     | 250 (52.3)                 | 142 (33.0)                 | <0.001          |
| Female                                                      | 370 (61.8)                    | 304 (62.7)                        | 87 (30.2)                  | 139 (69.2)                    | 228 (47.7)                 | 288 (67.0)                 |                 |
| <b>Education</b>                                            |                               |                                   |                            |                               |                            |                            |                 |
| Higher secondary or less                                    | 34 (5.7)                      | 55 (11.3)                         | 46 (16.0)                  | 10 (5.0)                      | 22 (4.6)                   | 11 (2.6)                   | <0.001          |
| Tertiary                                                    | 565 (94.3)                    | 430 (88.7)                        | 242 (84.0)                 | 191 (95.0)                    | 456 (95.4)                 | 419 (97.4)                 |                 |
| <b>Residence</b>                                            |                               |                                   |                            |                               |                            |                            |                 |
| Rural                                                       | 105 (17.5)                    | 22 (4.5)                          | 130 (45.1)                 | 11 (5.5)                      | 12 (2.5)                   | 118 (27.4)                 | <0.001          |
| Suburban                                                    | 56 (9.3)                      | 72 (14.8)                         | 57 (19.8)                  | 47 (23.4)                     | 32 (6.7)                   | 78 (18.1)                  |                 |
| Urban                                                       | 438 (73.1)                    | 391 (80.6)                        | 101 (35.1)                 | 143 (71.1)                    | 434 (90.8)                 | 234 (54.4)                 |                 |
| <b>Was infected with COVID-19</b>                           |                               |                                   |                            |                               |                            |                            |                 |
| Yes                                                         | 85 (14.2)                     | 78 (16.1)                         | 7 (2.4)                    | 9 (4.5)                       | 112 (23.4)                 | 86 (20.0)                  | <0.001          |
| No                                                          | 514 (85.8)                    | 407 (83.9)                        | 281 (97.6)                 | 192 (95.5)                    | 366 (76.6)                 | 344 (80.0)                 |                 |
| <b>Any Family member or relative infected with COVID-19</b> |                               |                                   |                            |                               |                            |                            |                 |
| Yes                                                         | 211 (35.2)                    | 237 (48.9)                        | 22 (7.6)                   | 28 (13.9)                     | 186 (38.9)                 | 208 (48.4)                 | <0.001          |
| No                                                          | 388 (64.8)                    | 248 (51.1)                        | 266 (92.4)                 | 173 (86.1)                    | 292 (61.1)                 | 222 (51.6)                 |                 |

**Table S2.** COVID-19 vaccine conspiracy beliefs stratified by countries of residence.

| Questions                                                                                          | Answer<br><i>n</i> (%) | Country of Residence |              |            |            |            |            | <i>p</i> -Value |
|----------------------------------------------------------------------------------------------------|------------------------|----------------------|--------------|------------|------------|------------|------------|-----------------|
|                                                                                                    |                        | Pakistan             | Saudi Arabia | India      | Malaysia   | Sudan      | Egypt      |                 |
| Do you think COVID-19 was manmade to force everyone to get vaccinated?                             | Yes                    | 204 (34.1)           | 173 (35.7)   | 178 (61.8) | 62 (30.8)  | 172 (36.0) | 104 (24.2) | <0.001          |
|                                                                                                    | No                     | 395 (65.9)           | 312 (64.3)   | 110 (38.2) | 139 (69.2) | 306 (64.0) | 326 (75.8) |                 |
| Do you think the COVID-19 vaccine is a way of implanting people with microchips to control humans? | Yes                    | 136 (22.7)           | 61 (12.6)    | 61 (21.2)  | 18 (9.0)   | 100 (20.9) | 66 (15.3)  | <0.001          |
|                                                                                                    | No                     | 463 (77.3)           | 424 (87.4)   | 227 (78.8) | 183 (91.0) | 378 (79.1) | 364 (84.7) |                 |
| Do you think the COVID-19 vaccine will lead to infertility?                                        | Yes                    | 128 (21.4)           | 90 (18.6)    | 49 (17.0)  | 13 (6.5)   | 88 (18.4)  | 76 (17.7)  | <0.001          |
|                                                                                                    | No                     | 471 (78.6)           | 395 (81.4)   | 239 (83.0) | 188 (93.5) | 390 (81.6) | 354 (82.3) |                 |
| Do you believe that immunizing yourself and your children is harmful and this fact is covered up?  | Yes                    | 150 (25.0)           | 97 (20.0)    | 63 (21.9)  | 23 (11.4)  | 170 (35.6) | 144 (33.5) | <0.001          |
|                                                                                                    | No                     | 449 (75.0)           | 388 (80.0)   | 225 (78.1) | 178 (88.6) | 308 (64.4) | 286 (66.5) |                 |
| Do you think pharmaceutical companies are covering up the dangers of COVID-19 vaccines?            | Yes                    | 308 (51.4)           | 191 (39.4)   | 102 (35.4) | 54 (26.9)  | 248 (51.9) | 260 (60.5) | <0.001          |
|                                                                                                    | No                     | 291 (48.6)           | 294 (60.6)   | 186 (64.6) | 147 (73.1) | 230 (48.1) | 170 (39.5) |                 |
| Do you think people are being deceived about the COVID-19 vaccines' efficacy?                      | Yes                    | 296 (49.4)           | 129 (26.6)   | 141 (49.0) | 60 (29.9)  | 218 (45.6) | 238 (55.3) | <0.001          |
|                                                                                                    | No                     | 303 (50.6)           | 356 (73.4)   | 147 (51.0) | 141 (70.1) | 260 (54.4) | 192 (44.7) |                 |
| Do you think people are being deceived about the COVID-19 vaccines' safety?                        | Yes                    | 303 (50.6)           | 135 (27.8)   | 147 (51.0) | 64 (31.8)  | 224 (46.9) | 238 (55.3) | <0.001          |
|                                                                                                    | No                     | 296 (49.4)           | 350 (72.2)   | 141 (49.0) | 137 (68.2) | 254 (53.1) | 192 (44.7) |                 |

Table S3. Pairwise comparisons of COVID-19 vaccine conspiracy belief score using Dunn's test

| Pairwise comparisons        | Mean Rank          | P-value |
|-----------------------------|--------------------|---------|
| <i>Age (years)</i>          |                    |         |
| < 25 vs 26-40               | 1272.44 vs 1235.99 | 0.262   |
| < 25 vs > 40                | 1272.44 vs 1138.41 | 0.001   |
| 26-40 vs > 40               | 1235.99 vs 1138.41 | 0.028   |
| <i>Country of residence</i> |                    |         |
| Pakistan vs Saudi Arabia    | 1328.17 vs 1053.95 | < 0.001 |
| Pakistan vs India           | 1328.17 vs 1279.71 | 0.336   |
| Pakistan vs Malaysia        | 1328.17 vs 959.51  | < 0.001 |
| Pakistan vs Sudan           | 1328.17 vs 1319.31 | 0.837   |
| Pakistan vs Egypt           | 1328.17 vs 1349.15 | 0.637   |
| Saudi Arabia vs India       | 1053.95 vs 1279.71 | < 0.001 |
| Saudi Arabia vs Malaysia    | 1053.95 vs 959.51  | 0.109   |
| Saudi Arabia vs Sudan       | 1053.95 vs 1319.31 | < 0.001 |
| Saudi Arabia vs Egypt       | 1053.95 vs 1349.15 | < 0.001 |
| India vs Malaysia           | 1279.71 vs 959.51  | < 0.001 |
| India vs Sudan              | 1279.71 vs 1319.31 | 0.450   |
| India vs Egypt              | 1279.71 vs 1349.15 | 0.195   |
| Malaysia vs Sudan           | 959.51 vs 1319.31  | < 0.001 |
| Malaysia vs Egypt           | 959.51 vs 1349.15  | < 0.001 |
| Sudan vs Egypt              | 1319.31 vs 1349.15 | 0.523   |
| <i>Area/locality</i>        |                    |         |
| Rural vs Suburban           | 1382.68 vs 1212.14 | 0.001   |
| Rural vs Urban              | 1382.68 vs 1214.28 | < 0.001 |
| Suburban vs Urban           | 1212.14 vs 1214.28 | 0.958   |

Table S4. Multiple comparisons of vaccine hesitancy scores using the Games–Howell test.

| I                    | J            | Mean Difference (I-J) | Std. Error | p-Value | 95% Confidence Interval |             |
|----------------------|--------------|-----------------------|------------|---------|-------------------------|-------------|
|                      |              |                       |            |         | Lower Bound             | Upper Bound |
| Country of Residence |              |                       |            |         |                         |             |
| Pakistan             | Saudi Arabia | 1.12152               | 0.49058    | 0.201   | -0.2795                 | 2.5226      |
|                      | India        | 1.46600 *             | 0.48743    | 0.033   | 0.0723                  | 2.8597      |
|                      | Malaysia     | 3.57281 *             | 0.52298    | 0.000   | 2.0747                  | 5.0709      |
|                      | Sudan        | -3.47494 *            | 0.48475    | 0.000   | -4.8593                 | -2.0905     |
|                      | Egypt        | -6.26021 *            | 0.41309    | 0.000   | -7.4398                 | -5.0807     |
| Saudi Arabia         | Pakistan     | -1.12152              | 0.49058    | 0.201   | -2.5226                 | 0.2795      |
|                      | India        | 0.34448               | 0.56552    | 0.990   | -1.2714                 | 1.9604      |
|                      | Malaysia     | 2.45129 *             | 0.59643    | 0.001   | 0.7453                  | 4.1573      |
|                      | Sudan        | -4.59646 *            | 0.56321    | 0.000   | -6.2047                 | -2.9882     |
|                      | Egypt        | -7.38173 *            | 0.50286    | 0.000   | -8.8179                 | -5.9455     |
| India                | Pakistan     | -1.46600 *            | 0.48743    | 0.033   | -2.8597                 | -0.0723     |
|                      | Saudi Arabia | -0.34448              | 0.56552    | 0.990   | -1.9604                 | 1.2714      |
|                      | Malaysia     | 2.10681 *             | 0.59385    | 0.006   | 0.4072                  | 3.8064      |

|          |              |            |         |       |          |         |
|----------|--------------|------------|---------|-------|----------|---------|
|          | Sudan        | −4.94094 * | 0.56048 | 0.000 | −6.5425  | −3.3394 |
|          | Egypt        | −7.72621 * | 0.49979 | 0.000 | −9.1552  | −6.2972 |
| Malaysia | Pakistan     | −3.57281 * | 0.52298 | 0.000 | −5.0709  | −2.0747 |
|          | Saudi Arabia | −2.45129 * | 0.59643 | 0.001 | −4.1573  | −0.7453 |
|          | India        | −2.10681 * | 0.59385 | 0.006 | −3.8064  | −0.4072 |
|          | Sudan        | −7.04775 * | 0.59165 | 0.000 | −8.7402  | −5.3553 |
|          | Egypt        | −9.83302 * | 0.53452 | 0.000 | −11.3638 | −8.3022 |
|          | Pakistan     | 3.47494 *  | 0.48475 | 0.000 | 2.0905   | 4.8593  |
| Sudan    | Saudi Arabia | 4.59646 *  | 0.56321 | 0.000 | 2.9882   | 6.2047  |
|          | India        | 4.94094 *  | 0.56048 | 0.000 | 3.3394   | 6.5425  |
|          | Malaysia     | 7.04775 *  | 0.59165 | 0.000 | 5.3553   | 8.7402  |
|          | Egypt        | −2.78527 * | 0.49718 | 0.000 | −4.2053  | −1.3653 |
|          | Pakistan     | 6.26021 *  | 0.41309 | 0.000 | 5.0807   | 7.4398  |
| Egypt    | Saudi Arabia | 7.38173 *  | 0.50286 | 0.000 | 5.9455   | 8.8179  |
|          | India        | 7.72621 *  | 0.49979 | 0.000 | 6.2972   | 9.1552  |
|          | Malaysia     | 9.83302 *  | 0.53452 | 0.000 | 8.3022   | 11.3638 |
|          | Sudan        | 2.78527 *  | 0.49718 | 0.000 | 1.3653   | 4.2053  |

\* The mean difference is significant at the 0.05 level.

## Data Collection Instrument

### Section I:

The aim of this study is to assess the attitudes towards the COVID-19 vaccines among the general public. The participation in the study is completely voluntary. The study is purely for research purpose and all information provided will be treated with utmost confidentiality.

#### Please note

- You must be 18 or older to participate in this study.
- By completing this survey, you are consenting to participate in this study.

### Section II:

**Age (Years):** (A) 18-25 (B) 26-40 (C) 41-60 (D) > 60

**Gender:** (A) Male (B) Female (C) Prefer not to say

**Education level:** (A) Primary (B) Secondary or higher secondary (C) Tertiary

**Residence:** (A) Urban (B) Sub-urban (C) Rural

**Country of residence:** \_\_\_\_\_

**Are you suffering from any chronic diseases (hypertension, diabetes, heart disease, respiratory disease etc.)?**

(A) Yes (B) No

**Did you get infected with COVID-19?**

(A) Yes (B) No

**Did anyone in your family get infected with COVID-19?**

(A) Yes (B) No

### Section III:

**Do you think the current coronavirus (COVID-19) was man-made to force everyone to get vaccinated?**

(A) Yes (B) No

**Do you think COVID-19 vaccine will be a way of implanting people with microchips to control humans?**

(A) Yes (B) No

**Do you think COVID-19 vaccine will lead to infertility?**

(A) Yes (B) No

**Do you believe that immunizing yourself and your children is harmful and this fact is covered up?**

(A) Yes (B) No

**Do you think pharmaceutical companies are covering up the dangers of COVID-19 vaccine?**

(A) Yes (B) No

**Do you think people are being deceived about COVID-19 vaccine efficacy?**

(A) Yes (B) No

**Do you think people are being deceived about COVID-19 vaccine safety?**

(A) Yes (B) No

### Section IV:

**Do you think it is acceptable for the government to force everyone to get COVID-19 vaccine?**

(A) Yes (B) No

### Section V:

**COVID-19 vaccine is important for myself, my family and other people of my community.**

(A) Strongly disagree (B) Disagree (C) Neutral (D) Agree (E) Strongly agree

**Getting COVID-19 vaccine is the best way to protect myself and my loved-ones from corona.**

(A) Strongly disagree (B) Disagree (C) Neutral (D) Agree (E) Strongly agree

**COVID-19 vaccine is effective.**

(A) Strongly disagree (B) Disagree (C) Neutral (D) Agree (E) Strongly agree

**Having myself vaccinated with COVID-19 vaccine is important for the health of others in my community.**

(A) Strongly disagree (B) Disagree (C) Neutral (D) Agree (E) Strongly agree

**COVID-19 vaccine offered by the government program in my community is beneficial.**

(A) Strongly disagree (B) Disagree (C) Neutral (D) Agree (E) Strongly agree

**The information I receive about COVID-19 vaccine from the authorities is reliable and trustworthy.**

(A) Strongly disagree (B) Disagree (C) Neutral (D) Agree (E) Strongly agree

**I will follow my doctor or health care provider's recommendation about COVID-19 vaccine for myself and my family.**

(A) Strongly disagree (B) Disagree (C) Neutral (D) Agree (E) Strongly agree

**COVID-19 vaccine carry more risks than older vaccines (chickenpox, polio, measles, mumps and rubella vaccines etc.)**

(A) Strongly disagree (B) Disagree (C) Neutral (D) Agree (E) Strongly agree

**I am deeply concerned about serious adverse effects of COVID-19 vaccine.**

(A) Strongly disagree (B) Disagree (C) Neutral (D) Agree (E) Strongly agree

**I do not need COVID-19 vaccine because this disease will eradicate soon**

(A) Strongly disagree (B) Disagree (C) Neutral (D) Agree (E) Strongly agree

### **Section VI:**

**I am willing to take COVID-19 vaccine only if it will be free of cost.**

(A) Yes (B) No

**I am willing to take COVID-19 vaccine even if I will have to pay for it.**

(A) Yes (B) No

**I will not take COVID-19 vaccine whether it's free or not.**

(A) Yes (B) No

*Thank you for participating in this survey.*

*Authors Notes: This data collection form can be used for education and research purposes with appropriate citations.*
